# Supplementary material for: Mycobacterium marseillense Infection in Human Skin, China, 2018
Source: PubMed Central journal article supplement (PMC6759254; doi:10.3201/eid2510.190695), 2019-10
Supplement: 19-0695-Techapp-s1.pdf [file 19-0695-Techapp-s1.pdf]

# *Mycobacterium marseillense* Infection in Human Skin, China, 2018

## Appendix 1

### Material and Methods

#### Ethic Statement

Informed consent was obtained from the patient. Ethics approval was obtained from the ethics review board of the Institute of Dermatology, Chinese Academy of Medical Sciences, Nanjing, China.

#### Tissue Culture, Bacterial Strains, Genomic DNA Extraction and Sequencing

Skin tissue grinding fluid and nasal discharge from the patient were collected and cultured on Löwenstein–Jensen medium at 32°C and 37°C. The grown colonies of bacteria on Löwenstein–Jensen medium were then carefully transferred to Middlebrook 7H10 agar with Middlebrook oleic albumin dextrose catalase (OADC) enrichment and cultured at 37°C.

*Mycobacterium marseillense* used in our study was isolated from the skin tissue of our patient. Genomic DNA Isolation was performed using a DNeasy Blood & Tissue kit (QIAGEN, The Netherlands) according to the manufacturer's instructions. The DNA purity and concentration was measured by NanoDrop 2000 spectrophotometer. Genome sequencing was conducted by Novogene Technology Co. Ltd (Beijing, China) using Illumina PE150.

## Genome Analyses

Circular genome maps were generated using Circos (Version 0.64) based on analysis of the coverage of sample sequencing reads, single-nucleotide polymorphisms (SNPs), and InDels. The coding genes were predicted by GeneMarkS software. CRISPRdigger was used to predict the CRISPRs (clustered regularly interspaced short palindromic repeats) of the genome. Scattered repeat sequences were predicted by RepeatMasker software, and TRF searched for tandem repeats in DNA sequences. Functional annotations were performed using the non-redundant protein (Nr) database, SwissProt, the Kyoto Encyclopedia of Genes and Genomes (KEGG) database, Cluster of Orthologous Groups of proteins (COG), Gene Ontology (GO), and protein families (Pfam). Antimicrobial resistance genes were detected based on the Antibiotic Resistance Genes Database (ARDB) and Comprehensive Antibiotic Resistance Database (CARD). Virulence factor annotation was carried out based on Virulence Factors of Pathogenic Bacteria database (VFDB) and Pathogen-Host Interactions database (PHI).

## Phylogenetic Analyses

The phylogenetic tree was built based on the 16S rRNA gene sequence of *M. marseillense* in this study and other reference strains, including *Mycobacterium intracellulare* ATCC 13950, *Mycobacterium avium* subsp. paratuberculosis K-10, *Mycobacterium chimaera* strain AH16, *Mycobacterium marseillense* strain FLAC0026, *Mycobacterium colombiense* CECT 3035, *Mycobacterium intracellulare* subsp. *yongonense* 05–1390, *Mycobacterium timonense* CCUG 56329, *Mycobacterium kansasii* ATCC 12478, *Mycobacterium leprae* TN, *Mycobacterium tuberculosis* H37Rv, *Mycobacterium ulcerans* Agy99, *Mycobacterium marinum* E11, and *Mycobacterium smegmatis* strain MC2 155. The gene sequences were downloaded from the NCBI.

**Appendix Table 1.** Information on *Mycobacterium marseillense*\*

| Sample ID              | nr    | SwissProt | KEGG  | COG   | TCDB | GO    | PHI | VFDB | ARDB | CARD | Secretory protein | T3SS | CAZY |
|------------------------|-------|-----------|-------|-------|------|-------|-----|------|------|------|-------------------|------|------|
| <i>M. marseillense</i> | 5,220 | 2,309     | 5,164 | 3,836 | 295  | 3,467 | 292 | 454  | 0    | 27   | 108               | 186  | 140  |

\*ARDB, Antibiotic Resistance Genes Database; CARD, Comprehensive Antibiotic Resistance Database; CAZY, Carbohydrate-Active enZymes Database; COG, Cluster of Orthologous Group; GO, Gene Ontology; ID, identification; KEGG, Kyoto Encyclopedia of Genes and Genomes; NR, redundant protein database; PHI, Pathogen-Host Interactions database; T3SS, type 3 secretion system; TCDB, Transporter Classification Database; VFDB, Virulence Factors of Pathogenic Bacteria database.

**Appendix Table 2.** Antimicrobial resistance genes found in *Mycobacterium marseillense* isolate from patient, China, 2018\*

| ORF ID                                                          | Best Hit e |                                                                           | Best       |                            |                                                                                                                                             | Bit              |                                                                                 |
|-----------------------------------------------------------------|------------|---------------------------------------------------------------------------|------------|----------------------------|---------------------------------------------------------------------------------------------------------------------------------------------|------------------|---------------------------------------------------------------------------------|
|                                                                 | value      | Best Hit ARO                                                              | Identities | ARO                        | ARO name                                                                                                                                    | score            | ARO category                                                                    |
| <i>M. marsei</i> GM004178, locus = Scaffold 16: 52255:52917:-   | 2.35E-157  | mtrA                                                                      | 1          | ARO: 3000816               | mtrA                                                                                                                                        | 436.032          | efflux pump conferring antibiotic resistance, gene modulating antibiotic efflux |
| <i>M. marsei</i> GM003653, locus = Scaffold 12: 152238:153491:+ | 0          | Mycobacterium tuberculosis murA                                           | 0.96875    | ARO: 3003784               | Mycobacterium tuberculosis murA                                                                                                             | 813.142          | fosfomycin resistance protein                                                   |
| <i>M. marsei</i> GM000974, locus = Scaffold 3: 140161:142677:+  | 0          | Mycobacterium tuberculosis gyrA conferring resistance to fluoroquinolones | 0.932934   | ARO: 3003295, ARO: 3003941 | Mycobacterium tuberculosis gyrA conferring resistance to fluoroquinolones, Shigella flexneri parC conferring resistance to fluoroquinolones | 1572.76, 386.726 | antibiotic resistant gene variant or mutant, fluoroquinolone resistance protein |

\*ARO, antibiotic resistance ontology; ID, identification; ORF, open reading frame.

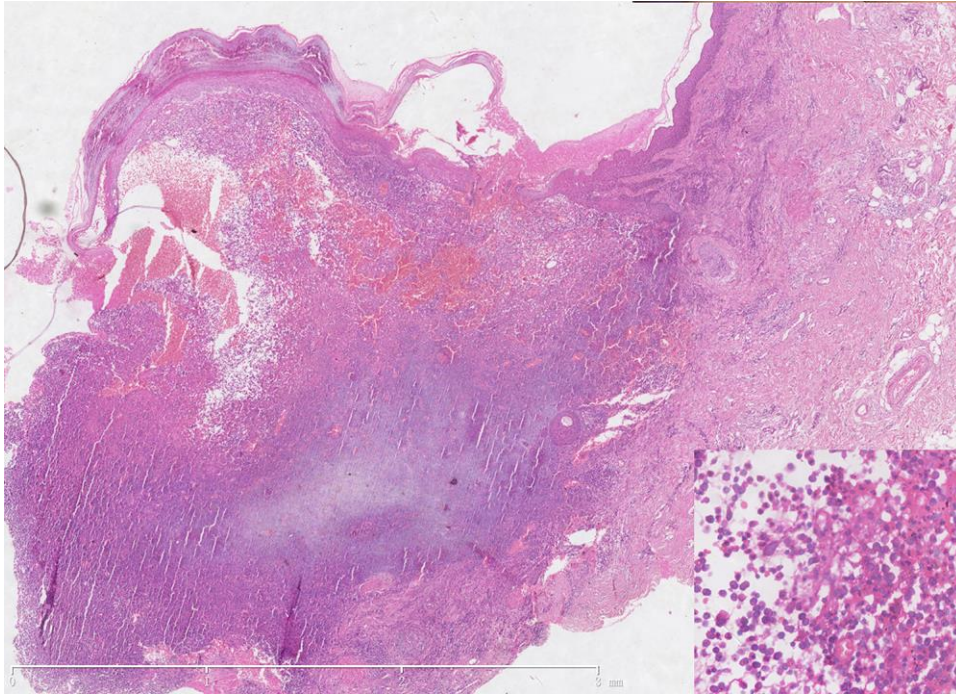

**Appendix Figure 1.** Hematoxylin and eosin stain of skin lesion (original magnification  $\times 4$ ). Inset shows part of the sample.

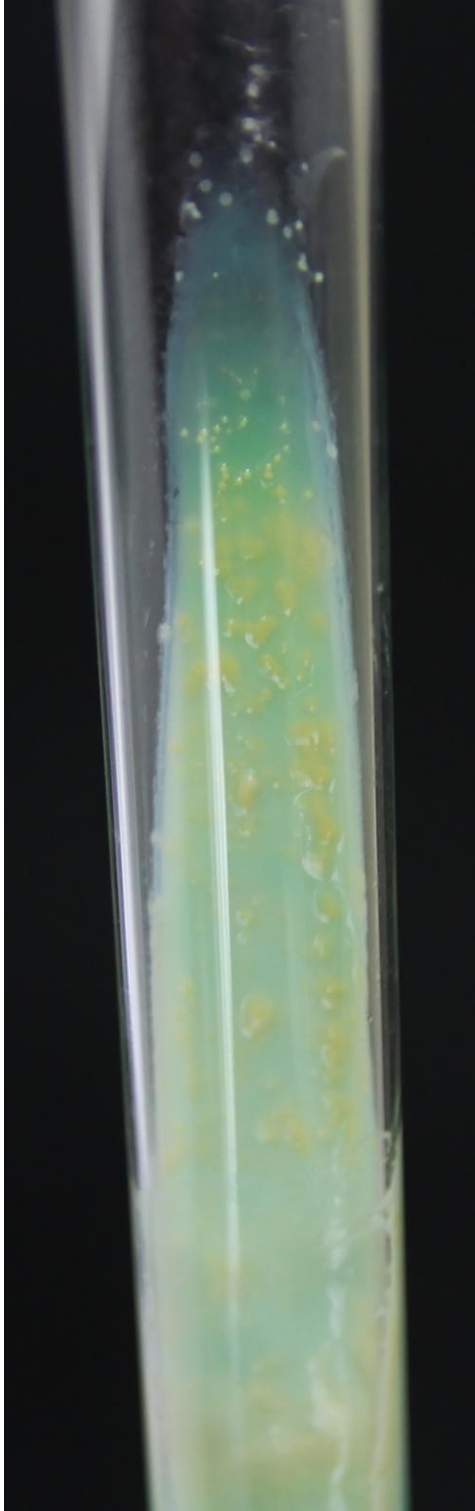

**Appendix Figure 2.** Tissue homogenate culture showing bacterial colonies after incubation on Löwenstein–Jensen medium.

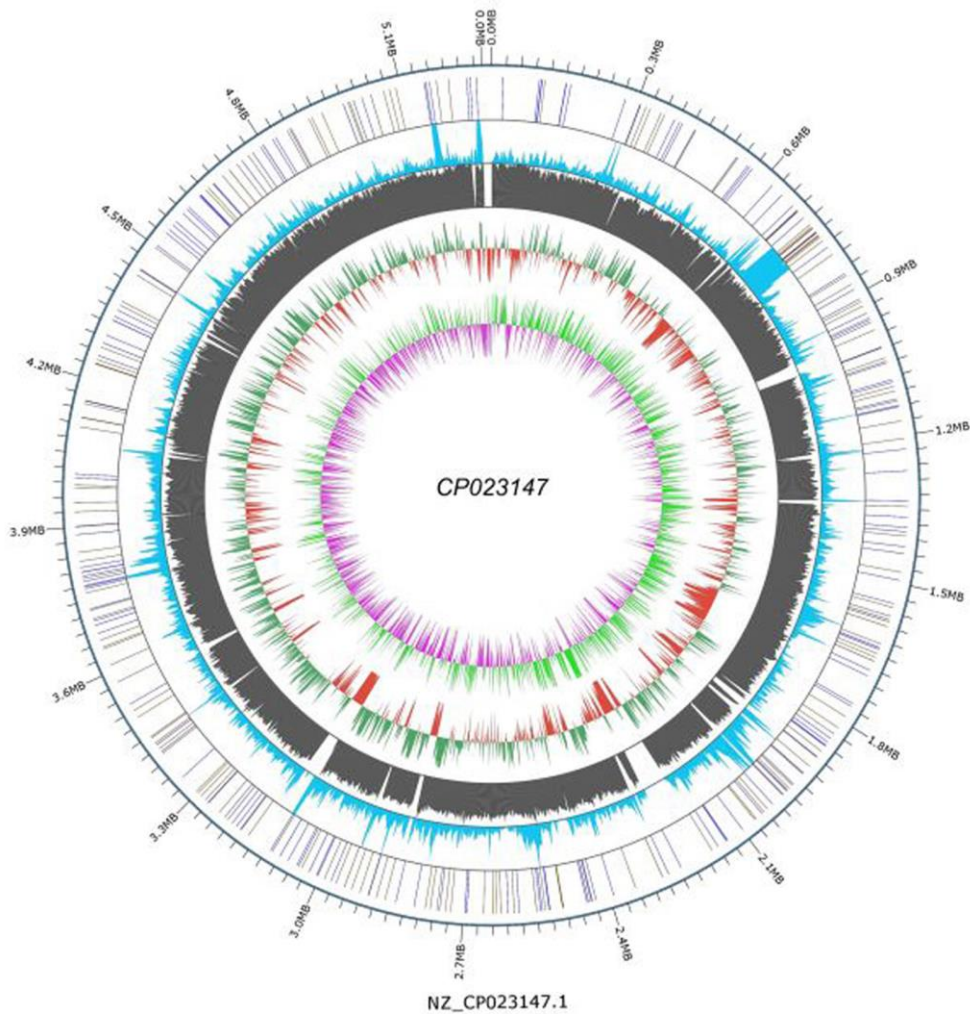

**Appendix Figure 3.** Overview of *Mycobacterium marseillense* genome. From the outermost to the innermost circle: the position coordinate of the reference sequence, the InDel distribution of the sample, the single-nucleotide polymorphism (SNP) number distribution of the sample, the reads coverage depth of the sample, the GC content of the reference sequence genome, and the GC skew value distribution of the reference sequence genome, respectively.

### COG function classification

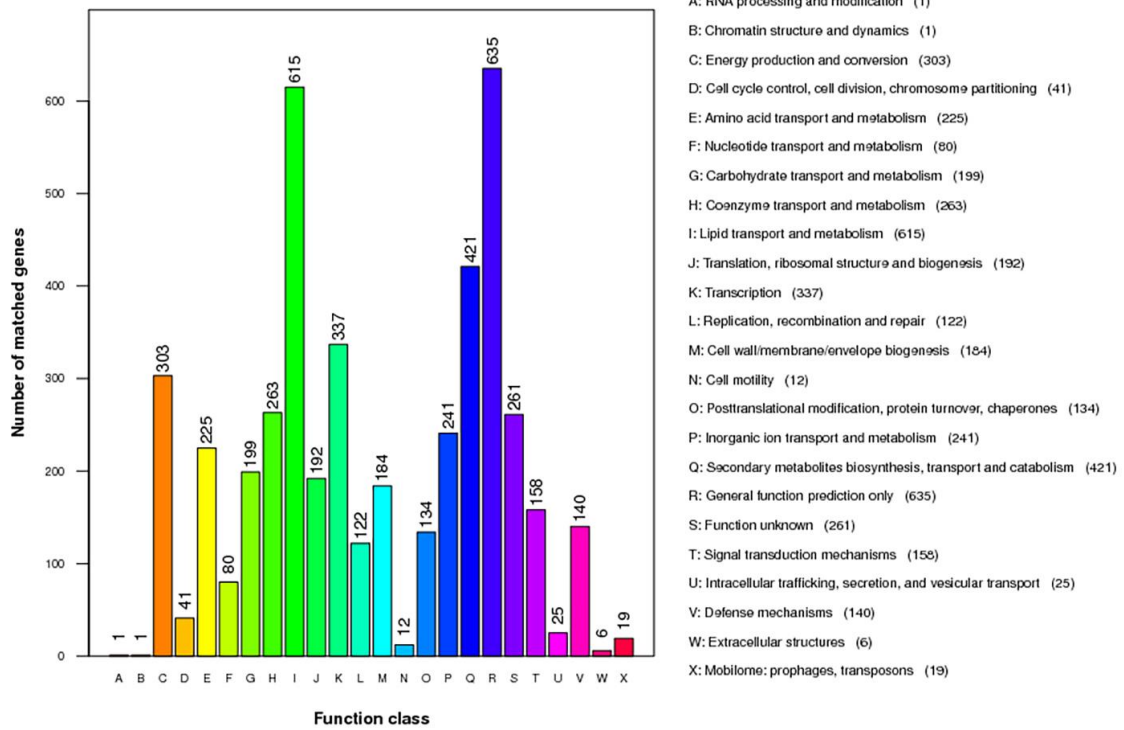

**Appendix Figure 4.** Function categories of genes by Cluster of Orthologous Group annotation.
